# Supplementary material for: Intersegmental coupling and recovery from perturbations in freely running cockroaches
Source: PubMed Central journal article supplement (PMC4302167; doi:10.1242/jeb.112805), 2015-01-15
Supplement: supp_218.2.285_JEB112805.pdf [file supp_218.2.285_JEB112805.pdf]

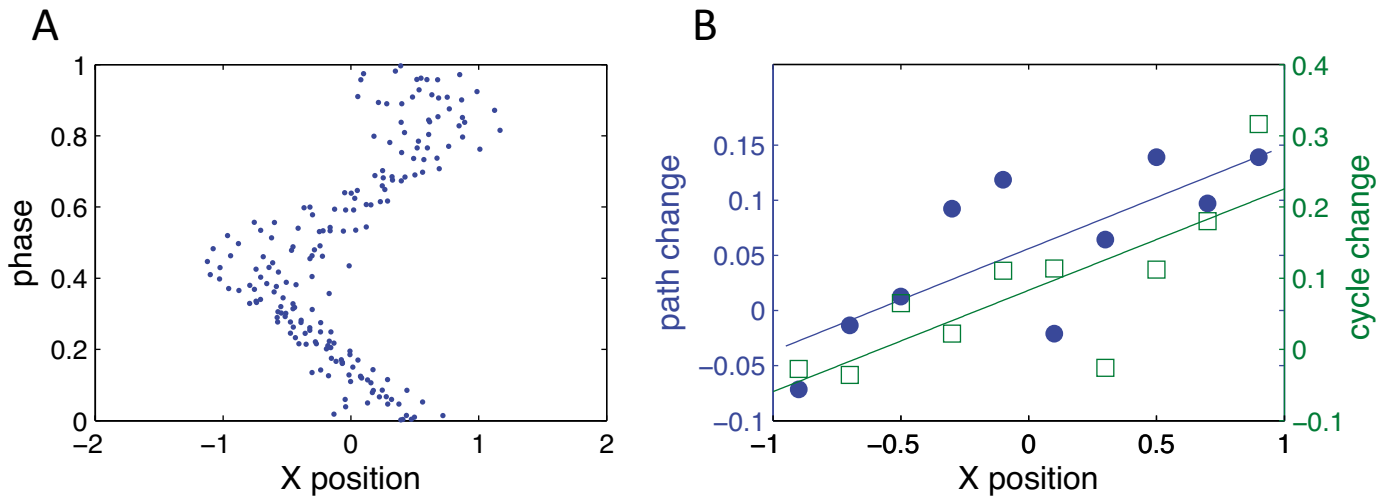

**Fig. S1.** (A) An example of mapping normalized tarsi positions on the x-axis to phases over the stance/swing cycle. (B) Effects of perturbations on tarsus path length (x-position, blue dots) and cycle duration (open green squares) of perturbed leg as functions of normalized x-position at perturbation onset. Regression lines show stride lengths shortening for perturbations at anterior leg positions.

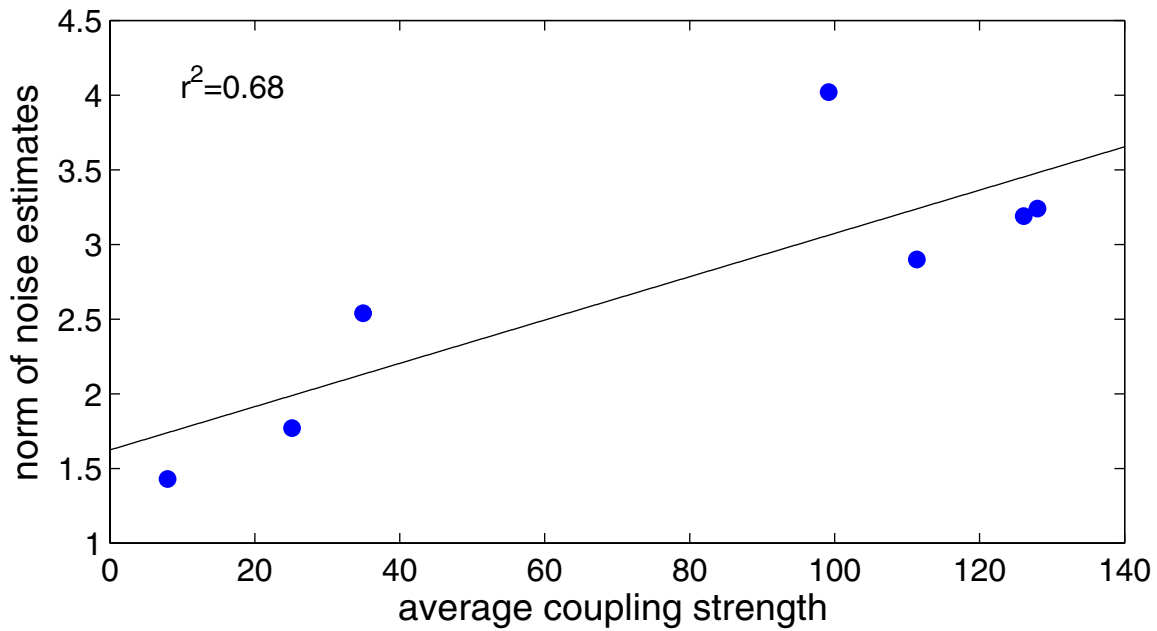

**Fig. S2.** Average absolute coupling strengths  $\frac{1}{7} \sum_{i=1}^7 c_i$  for each preparation plotted against the norm of noise estimates  $\bar{s}$ , showing a significant correlation ( $P < 0.05$ ).

**Table S1. Bayesian Information Criteria for different model architectures**

| Number of coupling parameters |         |         |         |         |         |         |         |         |          |
|-------------------------------|---------|---------|---------|---------|---------|---------|---------|---------|----------|
| 14 par                        | 11 par  | 9 par   | 7 par   | 6 par   | 4 par   | 3 par   | 2 par   | 1 par   | Diagonal |
| -409.35                       | -402.96 | -422.3  | -399.47 | -406.42 | -433.06 | -426.15 | -354.14 | -384.57 | -401.81  |
| -373.4                        | -371.22 | -379.98 | -397.37 | -401.56 | -380.51 | -369.62 | -353.56 | -378.6  | -346.14  |
| -617.51                       | -602.27 | -610.17 | -632.34 | -624.61 | -628.27 | -581.22 | -492.97 | -378.6  | -585.16  |
| -922.85                       | -942.26 | -947.19 | -951.4  | -954.77 | -959.77 | -963.31 | -870.71 | -930.18 | -840.61  |
| -569.88                       | -575.37 | -583.66 | -590.37 | -593.38 | -623.7  | -592.79 | -521.44 | -586.66 | -486.67  |
| -816.74                       | -875.5  | -883.6  | -880.88 | -897.46 | -884.88 | -888.51 | -726.09 | -842.72 | -617.16  |
| -611.32                       | -614.18 | -622.59 | -630.69 | -635.56 | -642.87 | -646.56 | -588.59 | -634.27 | -460.78  |

Preparations are listed in the same order as in Tables S2 and S3 and in Fig. 5B of the main text.

Lowest BIC scores are marked in blue.

**Table S2. Absolute coupling strengths  $c_j$  and average intrinsic noise levels  $\bar{\sigma} = \sqrt{\sum_{i=1}^6 \sigma_i^2}$**

| Estimated parameters |        |       |        |        |        |        |        |                |
|----------------------|--------|-------|--------|--------|--------|--------|--------|----------------|
| Frequency            | $c_1$  | $c_2$ | $c_3$  | $c_4$  | $c_5$  | $c_6$  | $c_7$  | $\bar{\sigma}$ |
| 4.17                 | 6.61   | 4.75  | 8.93   | 6.5    | 9.65   | 14.12  | 5.16   | 1.43           |
| 4.18                 | 33.52  | 27.8  | 80.74  | 19.02  | 30.26  | 32.88  | 20.42  | 2.54           |
| 11.46                | 222.14 | 101.9 | 151.01 | 89.05  | 116.89 | 123.26 | 78.31  | 3.19           |
| 14.26                | 166.58 | 66.83 | 205.01 | 107.23 | 135.5  | 113.34 | 101.43 | 3.24           |
| 14.59                | 20.06  | 12.67 | 22.68  | 23.58  | 26.75  | 50.49  | 19.73  | 1.77           |
| 15.61                | 184.17 | 93.09 | 194.92 | 57.44  | 52.16  | 54.52  | 57.92  | 4.02           |
| 18.28                | 97.11  | 20.92 | 192.37 | 113.29 | 91.74  | 158.92 | 105.12 | 2.90           |

**Table S3. Preferred phase differences  $\psi_{ij} \in [0,1]$  (modulo 1), individual noise magnitude estimates  $\sigma_i$  and measurement noise estimates  $\sigma_m$**

| frequency | $\psi_{21}$ | $\psi_{31}$ | $\psi_{41}$ | $\psi_{51}$ | $\psi_{61}$ | $\sigma_1$ | $\sigma_2$ | $\sigma_3$ | $\sigma_4$ | $\sigma_5$ | $\sigma_6$ | $\sigma_m$ |
|-----------|-------------|-------------|-------------|-------------|-------------|------------|------------|------------|------------|------------|------------|------------|
| 4.17      | 0.467       | 0.963       | 0.494       | 0.976       | 0.468       | 0.71       | 0.23       | 0.65       | 0.77       | 0.63       | 0.24       | 0.08       |
| 4.18      | 0.467       | 0.926       | 0.434       | 0.977       | 0.416       | 1.20       | 0.40       | 0.69       | 1.89       | 0.24       | 0.87       | 0.05       |
| 11.46     | 0.483       | 0.940       | 0.425       | 0.001       | 0.403       | 1.31       | 0.71       | 1.02       | 0.98       | 1.94       | 1.48       | 0.01       |
| 14.26     | 0.559       | 0.067       | 0.503       | 0.057       | 0.548       | 1.32       | 1.18       | 1.51       | 0.89       | 1.80       | 0.90       | 0.06       |
| 14.59     | 0.550       | 0.051       | 0.478       | 0.035       | 0.536       | 0.82       | 0.06       | 0.87       | 0.93       | 0.22       | 0.88       | 0.01       |
| 15.61     | 0.615       | 0.058       | 0.600       | 0.134       | 0.576       | 0.48       | 2.74       | 1.30       | 0.60       | 2.45       | 0.59       | 0.10       |
| 18.28     | 0.580       | 0.119       | 0.460       | 0.098       | 0.618       | 0.92       | 1.38       | 1.25       | 1.50       | 1.02       | 0.90       | 0.07       |
